# Supplementary material for: State-Level Health Disparity Is Associated with Sarcoidosis Mortality
Source: MDPI journal article supplement (doi:10.3390/jcm10112366), 2021-05-27

**Supplemental Material**

**Figure S1.** Map of (A) Overall Health Rankings, (B) All Outcomes Health Rankings, and (C) All Determinants Health Rankings for 50 States of the US, 1999 to 2018.

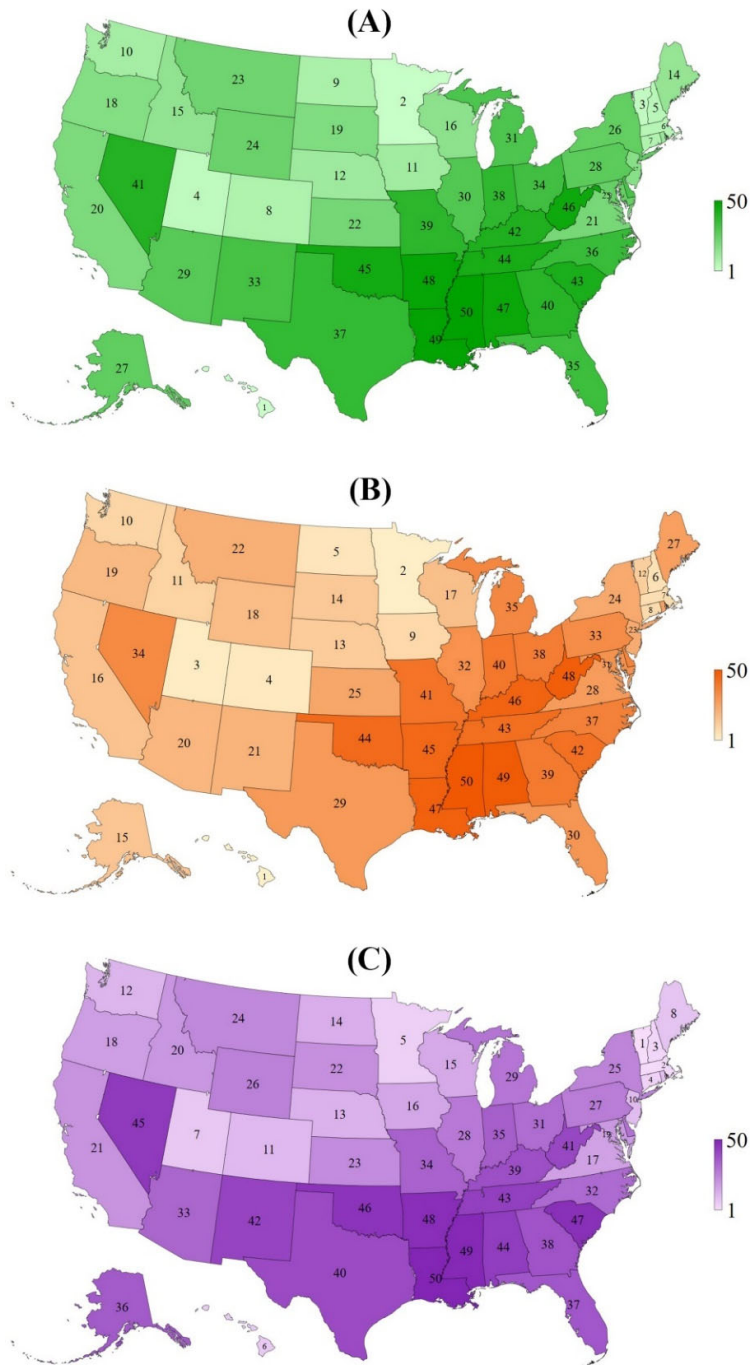

**Figure S2.** Map of FSR-WASOG Sarcoidosis Clinics for 50 States of the US.

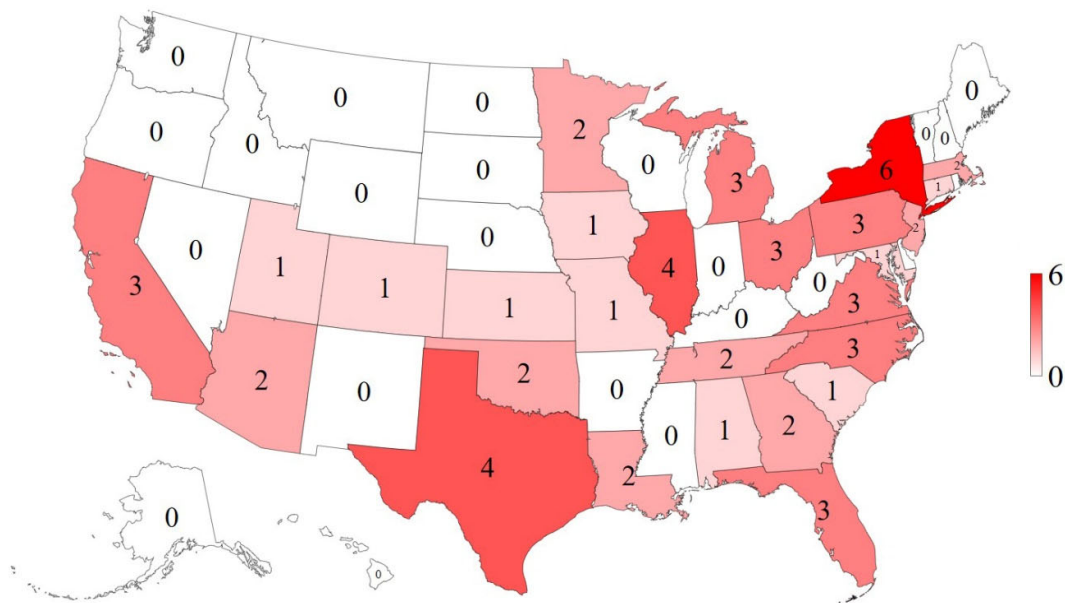

**Figure S3.** Association Between FSR-WASOG Sarcoidosis Clinics and Sarcoidosis-related AAMR for (A) All Population, (B) African Americans, and (C) European Americans.

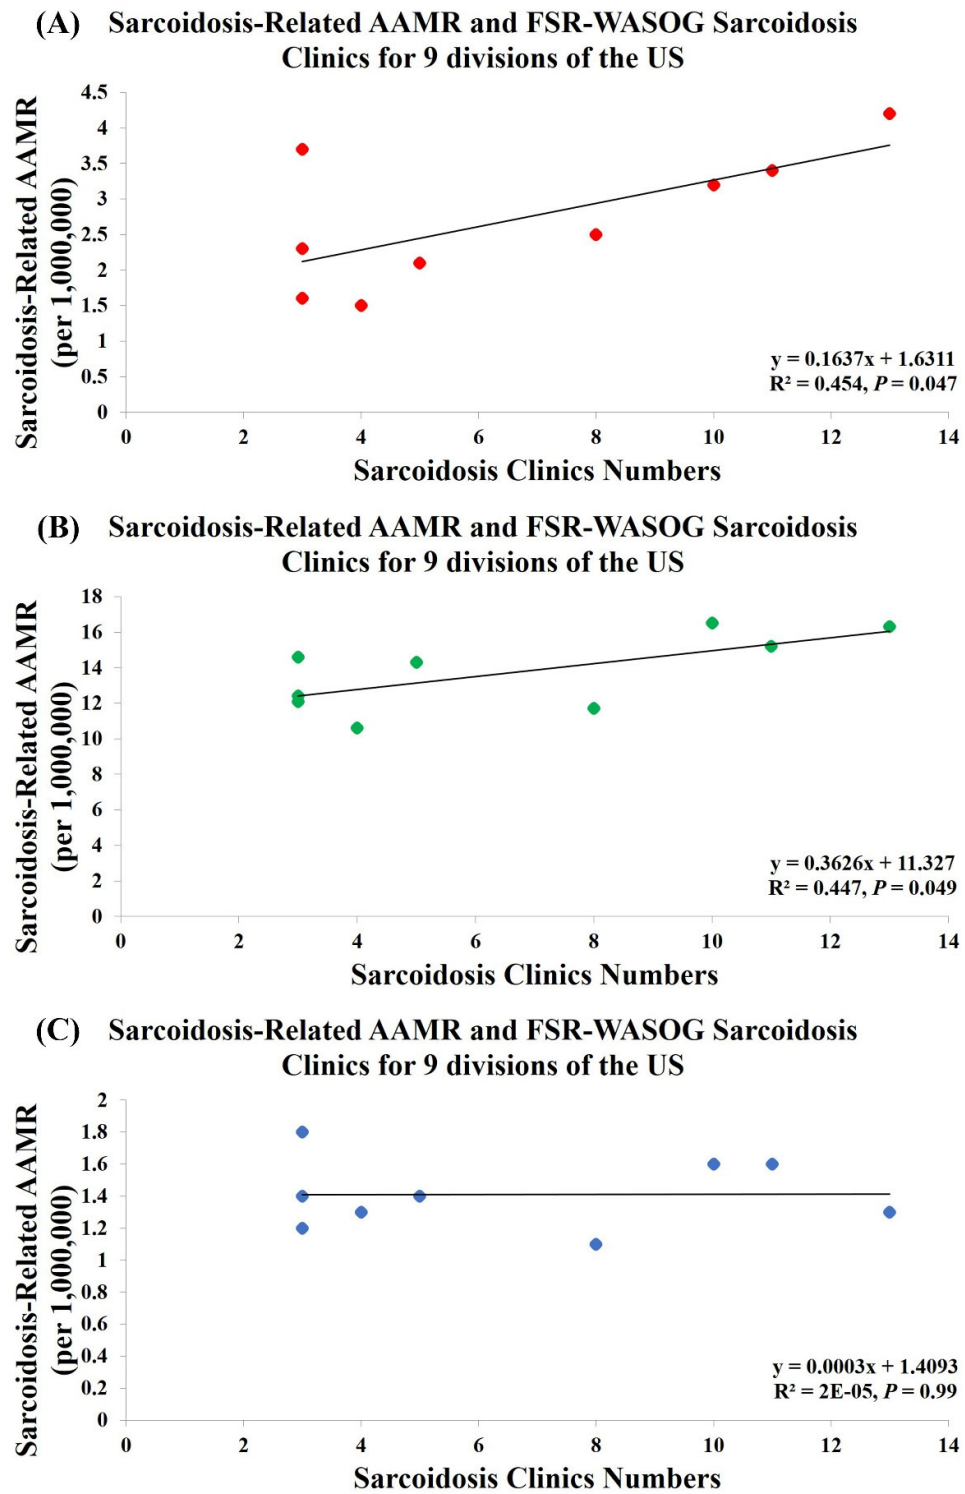

Supplement: s1 [file s1]
